# Supplementary material
Source: PubMed Central journal article supplement (PMC7724915)
Supplement: advancesADV2020002711-suppl1.pdf [file advancesADV2020002711-suppl1.pdf]

**Supplementary Table 1.**

Summary of proteins and antibodies used in the study.

| Target    |          |                                    |               |               | Antibody       |            |         |            |             |              |
|-----------|----------|------------------------------------|---------------|---------------|----------------|------------|---------|------------|-------------|--------------|
|           | Protein  | Protein intracellular localization | Gene symbol   | Gene location | Company        | Cat number | Species | Clonality  | Dilution Ab | MW peak      |
| <b>1</b>  | Aiolos   | N, PM, C                           | <i>IKZF_3</i> | 17q12-21      | Cell Signaling | 12720      | rabbit  | Polyclonal | 1:100       | 85           |
| <b>2</b>  | Cereblon | C, N                               | <i>CRBN</i>   | 3p26.2        | NovusBio       | NBP1-91810 | rabbit  | Polyclonal | 1:80        | 59           |
| <b>3</b>  | Ikaros   | N                                  | <i>IKZF_1</i> | 7p12.2        | Santa Cruz     | sc-13039   | rabbit  | Polyclonal | 1:50        | 70           |
| <b>4</b>  | IRF4     | N                                  | <i>IRF4</i>   | 6p25.3        | Santa Cruz     | sc-6059    | goat    | Polyclonal | 1:100       | 56           |
| <b>5</b>  | gankyrin | N, C                               | <i>PSMD10</i> | X22.3         | Abcam          | ab182576   | rabbit  | Monoclonal | 1:50        | 29           |
| <b>6</b>  | PSME1    | C, NB                              | <i>PSME1</i>  | 14q12         | NovusBio       | NBP1-83121 | rabbit  | Polyclonal | 1:50        | 37           |
| <b>7</b>  | GCR      | N, C, M                            | <i>NR3C1</i>  | 5q31.3        | Cell Signaling | 12041      | rabbit  | Monoclonal | 1:100       | 100          |
| <b>8</b>  | XPO1     | N, NM, V, C                        | <i>CRM1</i>   | 2p15          | Santa Cruz     | sc-74454   | mouse   | Monoclonal | 1:50        | 108          |
| <b>9</b>  | PSMA3    | C                                  | <i>PSMA3</i>  | 14q23.1       | Santa Cruz     | sc-166205  | mouse   | Monoclonal | 1:100       | 33           |
| <b>10</b> | PSMD1    | N,, AF                             | <i>PSMD1</i>  | 2q37.1        | Santa Cruz     | sc-514809  | mouse   | Monoclonal | 1:50        | 107          |
| <b>11</b> | PSMD4    | N, C                               | <i>PSMD4</i>  | 1q21.3        | Santa Cruz     | sc-398033  | mouse   | Monoclonal | 1:100       | 53           |
| <b>12</b> | AGO2     | N, CJ                              | <i>EIF2C2</i> | 8q24.3        | Santa Cruz     | sc-376696  | mouse   | Monoclonal | 1:50        | 106          |
| <b>13</b> | GAPDH    | PM, C, NM, V                       | <i>GAPDH</i>  | 12p13.31      | Cell Signaling | 2118       | rabbit  | Monoclonal | 1:50        | 42           |
| <b>14</b> | goat     |                                    |               |               | Santa Cruz     | sc-2020    | donkey  | Polyclonal | 1:100       | secondary Ab |

Protein localization according Human Protein Atlas available from <http://www.proteinatlas.org>

abbreviations: AF- actin filaments; C- cytoplasm; CJ- cell junctions; M- mitochondria; N- nucleoplasm; NB- nuclear bodies; NM- nuclear membrane; PM- plasma membrane; V- vesicles

**Supplementary Table 2.** Univariate cause-specific hazard (CSH) analysis of time to progression and progression-free survival for the competing event (death due other causes)

| Protein         | cutoff | Group | n   | TTP                       |                     |               | PFS                       |                     |              |
|-----------------|--------|-------|-----|---------------------------|---------------------|---------------|---------------------------|---------------------|--------------|
|                 |        |       |     | HR (CI)                   | Median TTP (months) | p-value       | HR (CI)                   | Median PFS (months) | p-value      |
| <b>Cereblon</b> | 0.045  | H     | 139 | 0.1285<br>(0.01376-1.2)   | NR                  | <i>0.0719</i> | 9.190e+06<br>(0-Inf)      | NR                  | <b>0.999</b> |
|                 |        | L     | 10  |                           | NR                  |               |                           | NR                  |              |
| <b>Ikars</b>    | 4.647  | H     | 24  | 1.231e-08<br>(0-Inf)      | NR                  | <i>0.999</i>  | 1.252e-08<br>(0-Inf)      | NR                  | <b>0.999</b> |
|                 |        | L     | 125 |                           | NR                  |               |                           | NR                  |              |
| <b>Aiolos</b>   | 0.351  | H     | 41  | 3.634e-09<br>(0-Inf)      | NR                  | <i>0.999</i>  | 3.697e-09<br>(0-Inf)      | NR                  | <b>0.999</b> |
|                 |        | L     | 108 |                           | NR                  |               |                           | NR                  |              |
| <b>IRF4</b>     | 0.539  | H     | 111 | 1.2404<br>(0.1386-11.1)   | NR                  | <i>0.847</i>  | 0.5957<br>(0.05402-6.57)  | NR                  | <b>0.67</b>  |
|                 |        | L     | 40  |                           | NR                  |               |                           | NR                  |              |
| <b>PSMD10</b>   | 0.548  | H     | 112 | 1.6634<br>(0.1858-14.89)  | NR                  | <i>0.649</i>  | 0.8595<br>(0.07792-9.479) | NR                  | <b>0.902</b> |
|                 |        | L     | 37  |                           | NR                  |               |                           | NR                  |              |
| <b>PSME1</b>    | 0.973  | H     | 105 | 0.6519<br>(0.1088-3.905)  | NR                  | <i>0.639</i>  | 3.189e+08<br>(0-Inf)      | NR                  | <b>0.999</b> |
|                 |        | L     | 44  |                           | NR                  |               |                           | NR                  |              |
| <b>GCR</b>      | 0.655  | H     | 136 | 0.4292<br>(0.04794-3.843) | NR                  | <i>0.449</i>  | 7.711e+07<br>(0-Inf)      | NR                  | <b>0.999</b> |
|                 |        | L     | 13  |                           | NR                  |               |                           | NR                  |              |
| <b>XPO1</b>     | 2.453  | H     | 89  | 0.1856<br>(0.02075-1.661) | NR                  | <i>0.132</i>  | 0.3642<br>(0.03302-4.017) | NR                  | <b>0.41</b>  |
|                 |        | L     | 62  |                           | NR                  |               |                           | NR                  |              |
| <b>PSMA3</b>    | 4.012  | H     | 15  | 1.304e-08<br>(0-Inf)      | NR                  | <i>0.999</i>  | 1.320e-08<br>(0-Inf)      | NR                  | <b>0.999</b> |
|                 |        | L     | 140 |                           | NR                  |               |                           | NR                  |              |
| <b>PSMD1</b>    | 3.458  | H     | 10  | 3.821e-08<br>(0-Inf)      | NR                  | <i>0.999</i>  | 3.839e-08<br>(0-Inf)      | NR                  | <b>0.999</b> |
|                 |        | L     | 145 |                           | NR                  |               |                           | NR                  |              |
| <b>PSMD4</b>    | 0.507  | H     | 34  | 0.94569<br>(0.1057-8.462) | NR                  | <i>0.96</i>   | 1.8993<br>(0.1722-20.95)  | NR                  | <b>0.6</b>   |
|                 |        | L     | 121 |                           | NR                  |               |                           | NR                  |              |
| <b>AGO2</b>     | 3.510  | H     | 12  | 3.715e-08<br>(0-Inf)      | NR                  | <i>0.998</i>  | 3.753e-08<br>(0-Inf)      | NR                  | <b>0.999</b> |
|                 |        | L     | 143 |                           | NR                  |               |                           | NR                  |              |

**Supplementary Table 3.**

**Patients' characteristics.**

The statistical analysis results using Chi Square or Fisher's exact tests, as appropriate, for categorical variables and the Mann-Whitney U test for continuous variables confirm that the cohort where the expression of the protein was analyzed is a representative for the full cohort analyzed in a GEM2012 and GEM2014MAN trials.

| PATIENT CHARACTERISTICS  | ALL PATIENTS (n=458) | PROTEIN COHORT (n=174) | p value |
|--------------------------|----------------------|------------------------|---------|
| Age years                | 58 (31- 65)          | 59 (31- 65)            | 0.744   |
| Gender                   |                      |                        | 0.747   |
| Male                     | 240 (52 %)           | 88 (50.5 %)            |         |
| Female                   | 218 (48 %)           | 76(49.5 %)             |         |
| Myeloma subtype          |                      |                        | 0.776   |
| IgG                      | 273 (60 %)           | 110 (63 %)             |         |
| IgA                      | 107 (23 %)           | 39 (23 %)              |         |
| Light chain              | 69 (15 %)            | 23 (13 %)              |         |
| IgD                      | 3 (1 %)              | 0 %                    |         |
| Non secretor             | 6 (1 %)              | 2 (1 %)                |         |
| Durie Stage              |                      |                        | 0.249   |
| I                        | 54 (12 %)            | 15 (9 %)               |         |
| II                       | 178 (39 %)           | 79 (45 %)              |         |
| III                      | 226 (49 %)           | 80 (46 %)              |         |
| Salmon Stage             |                      |                        | 0.900   |
| A                        | 449 (98 %)           | 170 (98 %)             |         |
| B                        | 8 (2 %)              | 4 (2 %)                |         |
| ISS Stage                |                      |                        | 0.275   |
| I                        | 179 (39 %)           | 56 (33 %)              |         |
| II                       | 166 (37 %)           | 68 (40 %)              |         |
| III                      | 107 (24 %)           | 47 (27 %)              |         |
| ISS-R Stage              |                      |                        | 0.696   |
| I                        | 182 (49 %)           | 77 (48 %)              |         |
| II                       | 151 (40 %)           | 70 (43 %)              |         |
| III                      | 40 (11 %)            | 14 (9 %)               |         |
| ECOG                     |                      |                        | 0.795   |
| 0                        | 195 (43 %)           | 73 (43 %)              |         |
| 1                        | 182 (40 %)           | 67 (39 %)              |         |
| 2                        | 62 (14 %)            | 22 (13 %)              |         |
| 3                        | 16 (3 %)             | 9 (5 %)                |         |
| Hemoglobin (g/dl)        | 10.9 (4.8-16.8)      | 10.6 (6.7-15.5)        | 0.099   |
| Creatinine (mg/dl)       | 0.9 (0.3-2)          | 0.9 (0.4-2)            | 0.407   |
| B2-microglobuline (mg/L) | 3.6 (0-62)           | 3.9 (1.6-17.4)         | 0.056   |
| LDH                      |                      |                        | 0.545   |
| High                     | 65 (15 %)            | 21 (12 %)              |         |
| Normal                   | 376 (85 %)           | 148 (88 %)             |         |
| Plasmacytoma             |                      |                        | 0.562   |
| Yes                      | 101 (22 %)           | 34 (20 %)              |         |
| No                       | 357 (78 %)           | 140 (80 %)             |         |
| Cytogenetics             |                      |                        |         |
| t(4;14)                  | 58/402 (14 %)        | 24/170 (14 %)          | 1       |
| t(14;16)                 | 17/394 (4 %)         | 5/169 (3 %)            | 0.600   |
| del(17p)                 | 35/388 (9 %)         | 16/164 (10 %)          | 0.910   |
| gain(1q)                 | 168/385 (44 %)       | 82/170 (48 %)          | 0.362   |
| del(1p)                  | 27/382 (7 %)         | 16/170 (9 %)           | 0.437   |
| Cytogenetic risk         |                      |                        | 0.776   |
| High                     | 92/379 (24 %)        | 37/163 (23 %)          |         |
| Standard                 | 287/379 (76 %)       | 126/163 (77 %)         |         |
| Median follow-up. months | 53 (14.7-82.3)       | 52.2 (24.5-68.4)       | 0.126   |

Supplementary table 4. Univariate cause-specific hazard (CSH) analysis of Progression free survival

| Protein  | cutoff | Group | n   | PFS           |                        | p-value |
|----------|--------|-------|-----|---------------|------------------------|---------|
|          |        |       |     | HR<br>(CI)    | Median PFS<br>(months) |         |
| Cereblon | 0.045  | H     | 142 | 0.316         | NR (52.90-NR)          | 0.003   |
|          |        | L     | 10  | (0.148-0.673) | 35.93 (7.97-NR)        |         |
| Aiolos   | 0.351  | H     | 43  | 1.68          | 51.27 (30.77-NR)       | 0.052   |
|          |        | L     | 109 | (0.996-2.833) | NR (54.87-NR)          |         |
| Ikaros   | 4.647  | H     | 24  | 1.866         | 41.82 (25.53-NR)       | 0.041   |
|          |        | L     | 128 | (1.027-3.39)  | NR (52.90-NR)          |         |
| AGO2     | 3.510  | H     | 12  | 2.396         | 41.9 (25.53-52.03)     | 0.011   |
|          |        | L     | 156 | (1.218-4.714) | NR (54.78-NR)          |         |
| IRF4     | 0.539  | H     | 113 | 0.59          | NR (52.90-NR)          | 0.045   |
|          |        | L     | 41  | (0.352-0.987) | 49.17 (26.57-NR)       |         |
| PSMA3    | 3.985  | H     | 17  | 1.636         | 48.13 (28.47-NR)       | 0.155   |
|          |        | L     | 141 | (0.830-3.221) | NR (52.90-NR)          |         |
| PSME1    | 0.981  | H     | 107 | 1.246         | 54.87 (50.77-NR)       | 0.437   |
|          |        | L     | 45  | (0.715-2.171) | NR (48.97-NR)          |         |
| PSMD1    | 3.458  | H     | 10  | 3.146         | 40.28 (8.47-50.77)     | 0.002   |
|          |        | L     | 148 | (1.544-6.41)  | NR (54.87-NR)          |         |
| PSMD4    | 0.507  | H     | 34  | 1.681         | 48.13 (35.07-NR)       | 0.059   |
|          |        | L     | 124 | (0.981-2.881) | NR (54.87-NR)          |         |
| PSMD10   | 0.548  | H     | 115 | 2.652         | 52.80 (45.50-NR)       | 0.010   |
|          |        | L     | 37  | (1.264-5.566) | NR (54.87-NR)          |         |
| GCR      | 0.655  | H     | 139 | 2.077         | 59.40 (50.77-NR)       | 0.216   |
|          |        | L     | 13  | (0.651-6.621) | NR (36.33-NR)          |         |
| XPO1     | 2.453  | H     | 91  | 1.314         | 52.9 (48.13-NR)        | 0.292   |
|          |        | L     | 63  | (0.790-2.185) | NR (51.10-NR)          |         |

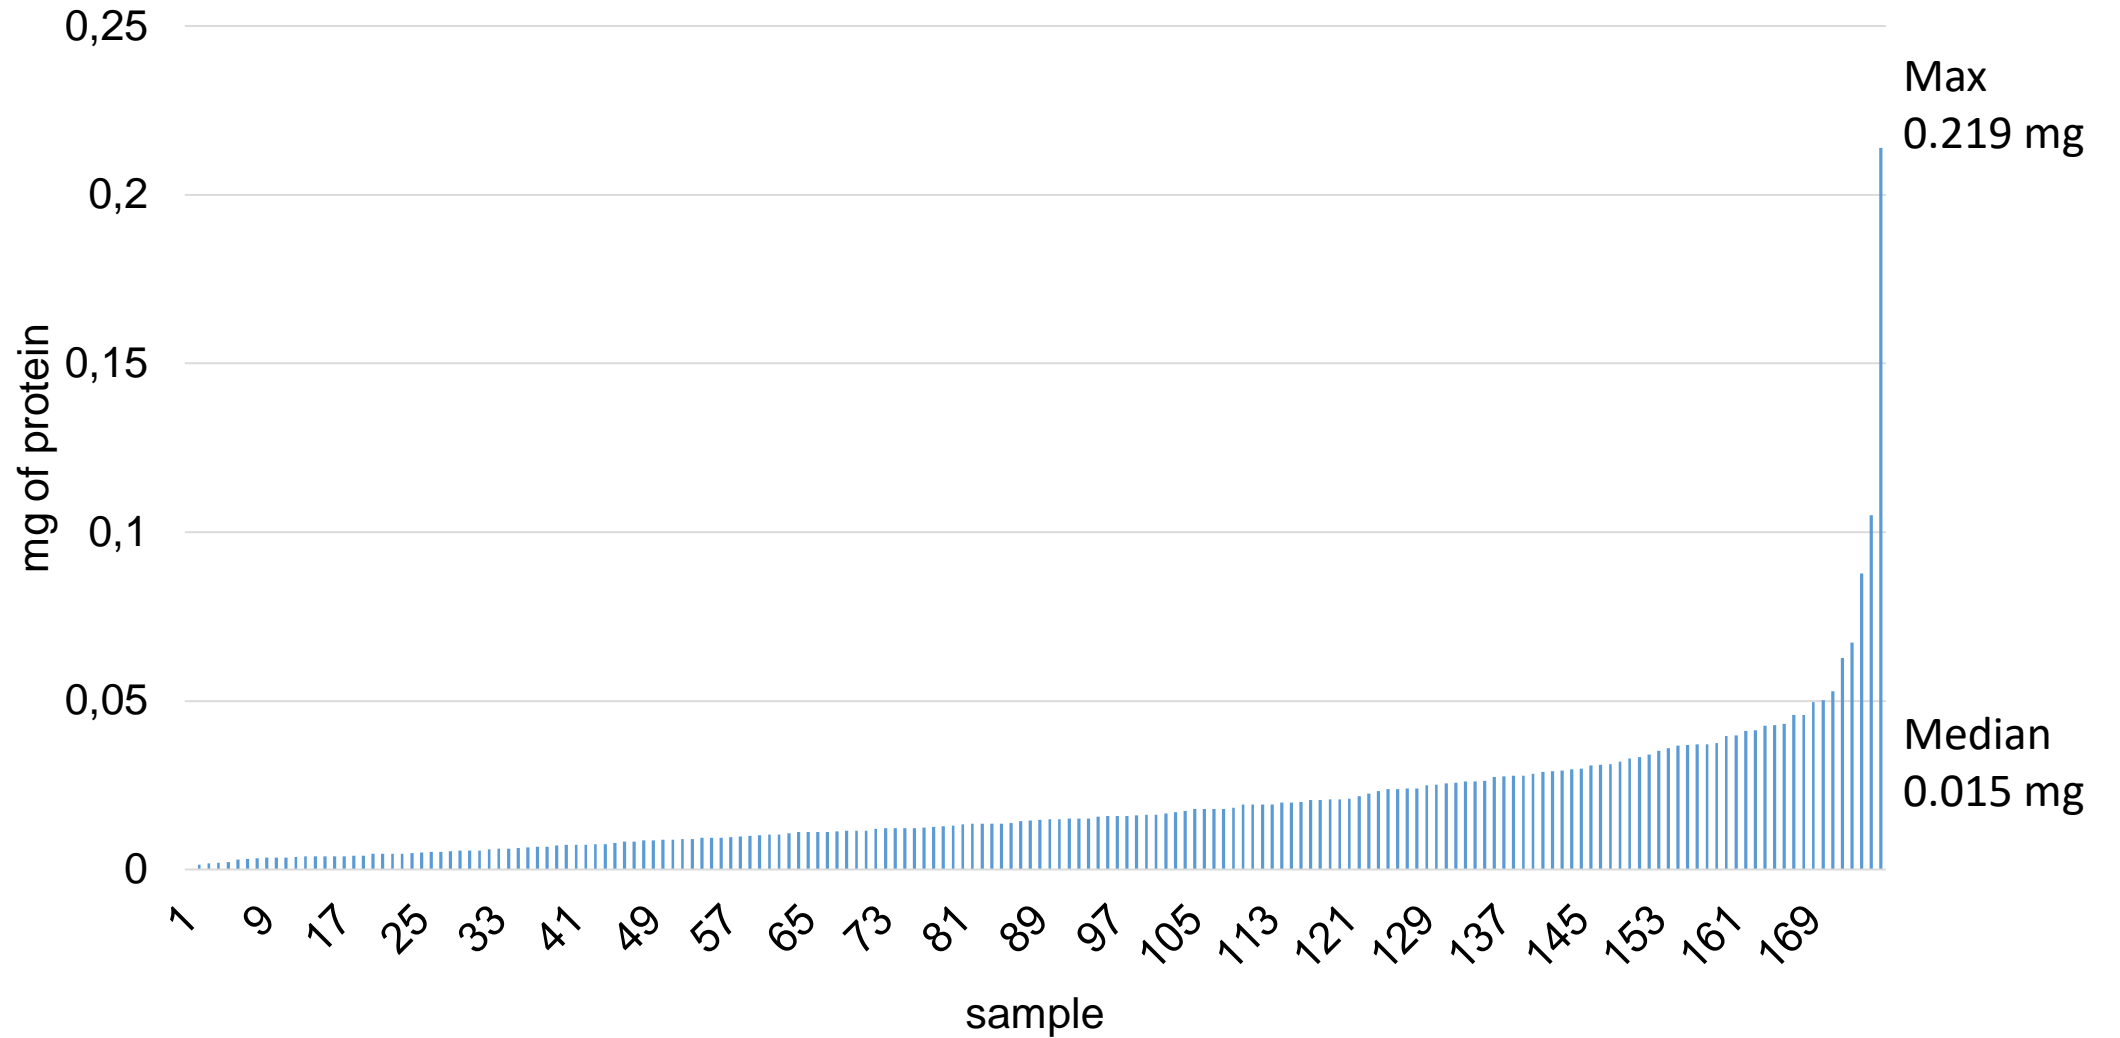

**Supplementary figure 1.** Amount of protein obtained for each sample. The proteins were extracted from RLT+, as previously described and quantified by Total Protein Assay (ProteinSimple) using WEST™ system (ProteinSimple).

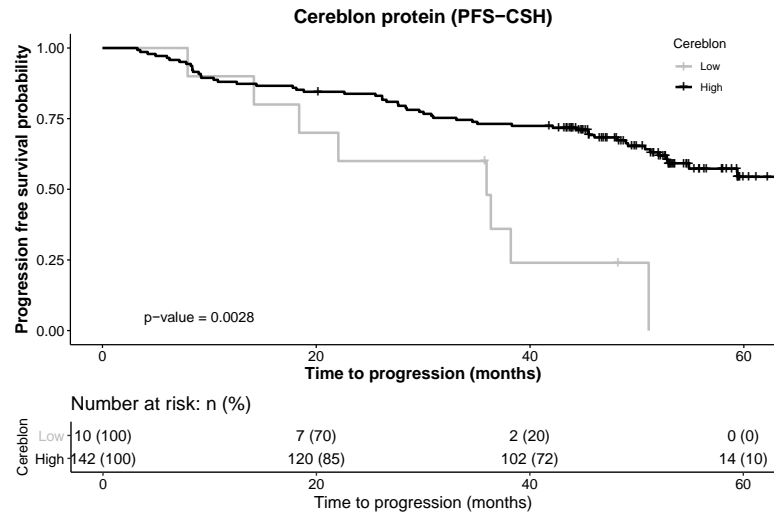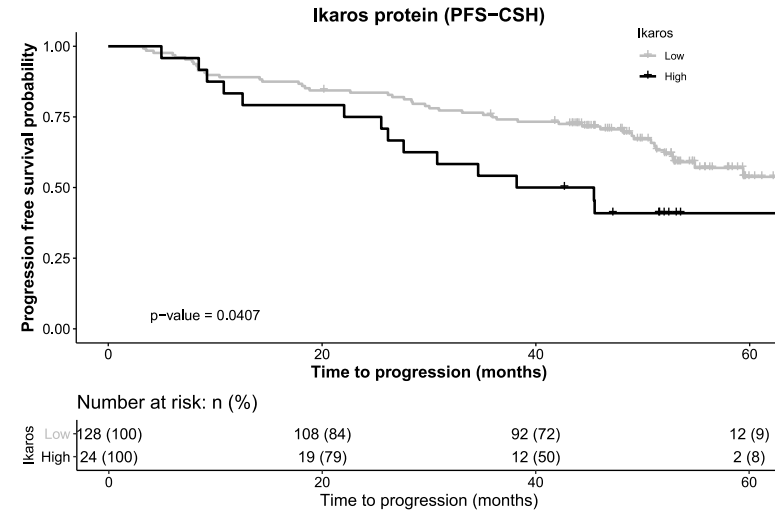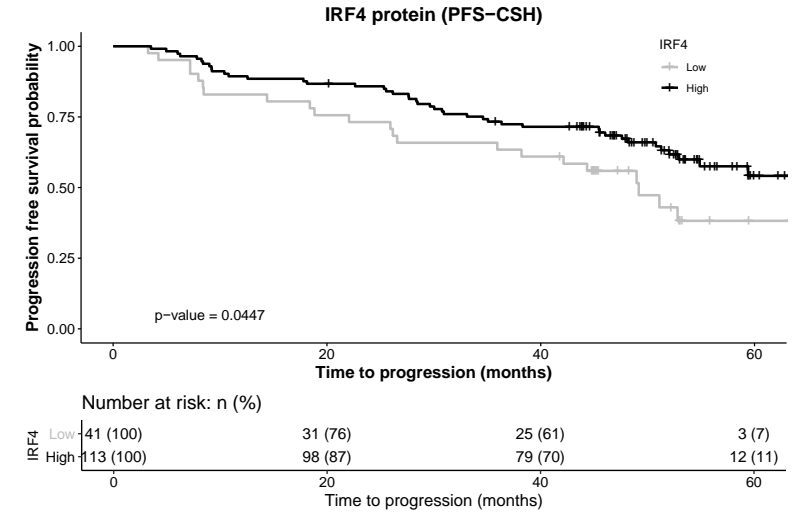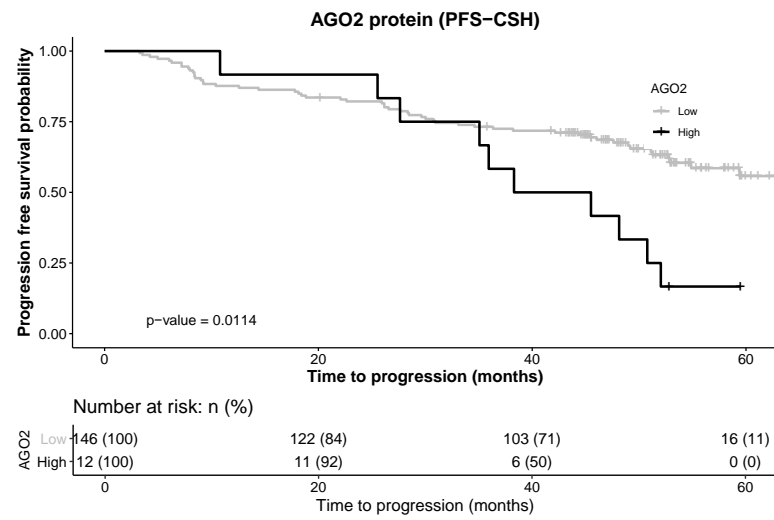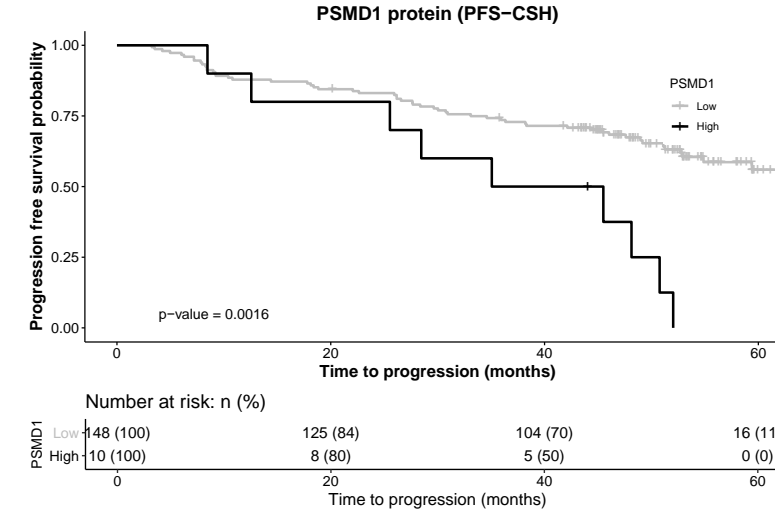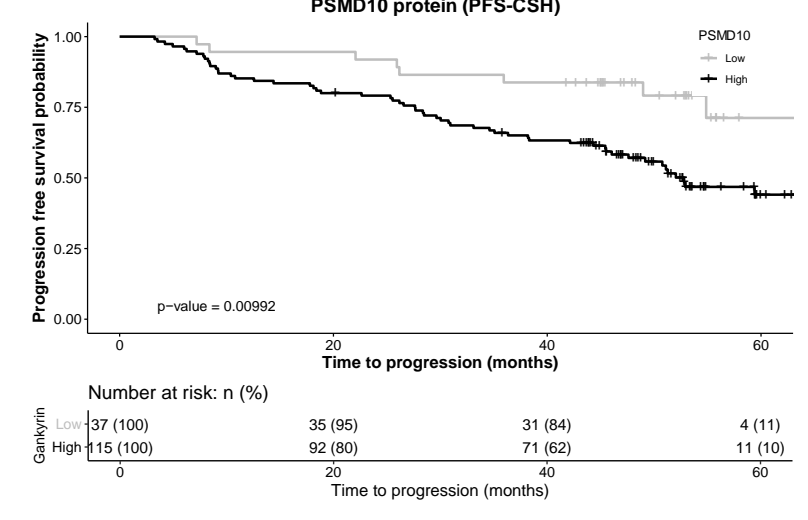

**Supplementary Figure 2. Progression free survival according to levels of protein expression in patients with low and high levels of proteins: cereblon, ikaros, IRF4, Ago2, PSMD1 and PSMD10- gankyrin.**
